# Supplementary material for: Synthesis of spherical superconductors
Source: Royal Society of Chemistry journal article supplement (doi:10.1039/c3ce40269j), 2013-01-01
Supplement: c3ce40269j.pdf [file c3ce40269j.pdf]

## Synthesis of spherical superconductors

Rebecca Boston,<sup>a,b</sup> Antony Carrington<sup>c</sup>, Dominic Walsh<sup>\*b</sup> and Simon R. Hall<sup>\*b</sup>

Supplementary Information

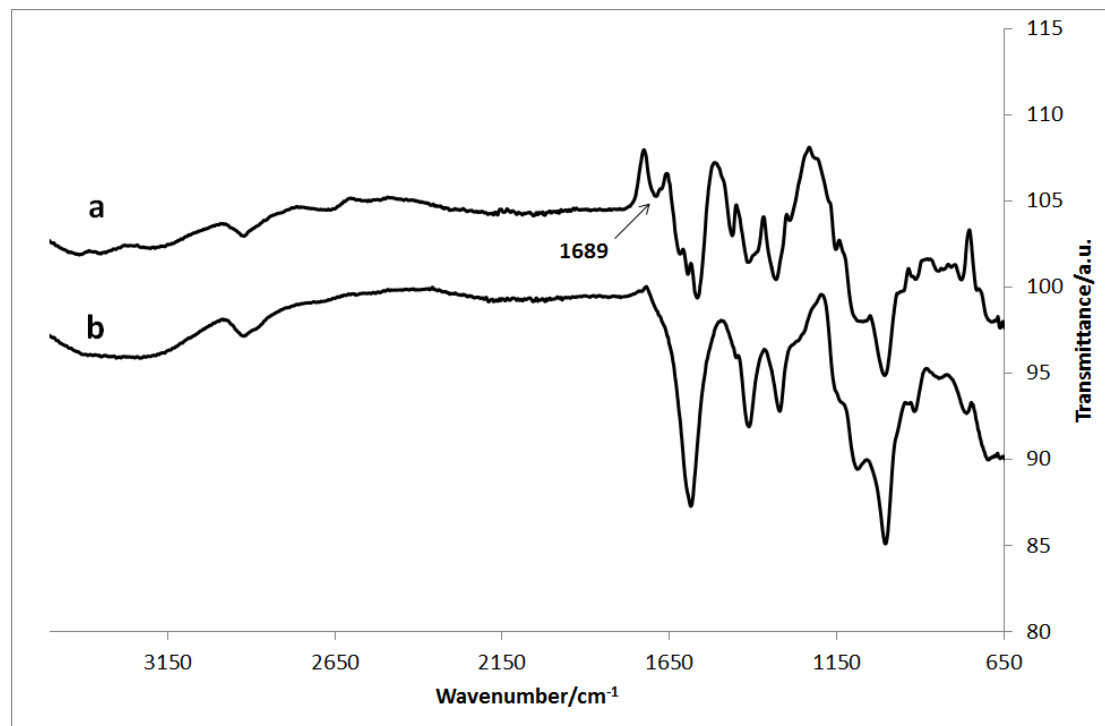

**Figure S1.** IR spectra of dried (a) CM-dextran/YBCO composite and (b) CM-dextran control sample. The appearance of the peak at  $1689\text{ cm}^{-1}$  is indicative of the presence of  $\text{COO}^-$  groups in the CM-dextran chelated to metal centres (see for example J. Control. Rel. **69**, 97, 2000).

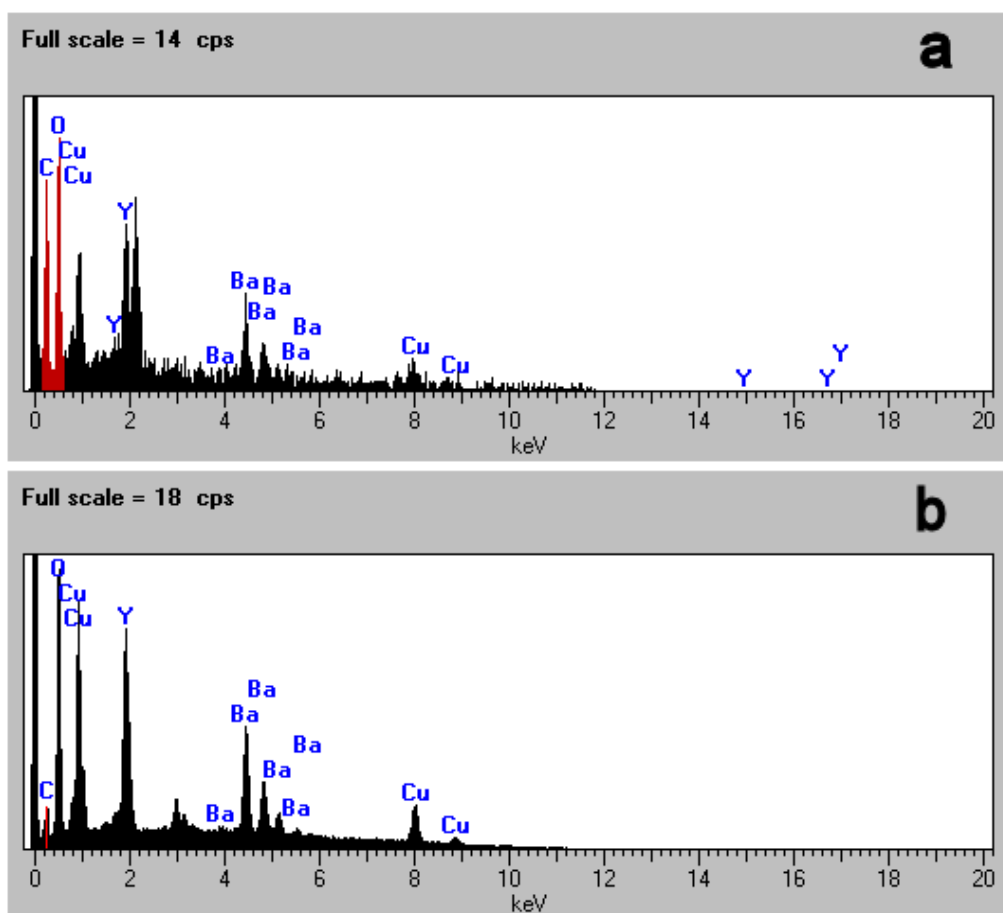

**Figure S2.** Energy dispersive X-ray analyses showing elemental composition of the YBCO spheres under calcination after (a) 800 °C and (b) 820 °C. The significant reduction of carbon can be attributed to loss of CO<sub>2</sub> after decomposition of BaCO<sub>3</sub> at 811 °C.
